# Supplementary material for: Time-dependent re-organization of biological processes by the analysis of the dynamic transcriptional response of yeast cells to doxorubicin
Source: Royal Society of Chemistry journal article supplement (doi:10.1039/d1mo00046b), 2021-05-25
Supplement: d1mo00046b2.pdf [file d1mo00046b2.pdf]

**Table S1. Module ID list of genes grouped by WGCNA**

| Gene Name | Module ID |
|-----------|-----------|-----------|-----------|-----------|-----------|-----------|-----------|
| SMP1      | 1         | YIG1      | 1         | NPA3      | 3         | DSE4      | 4         |
| KAR4      | 1         | YPL225W   | 1         | HOC1      | 3         | TAT2      | 4         |
| SRD1      | 1         | YPL245W   | 1         | BNA2      | 3         | LAG2      | 4         |
| RPN4      | 1         | BBP1      | 1         | EAF6      | 3         | DDR2      | 4         |
| TOS8      | 1         | CUB1      | 1         | MET14     | 3         | ARG1      | 4         |
| GAT4      | 1         | FUM1      | 1         | AUR1      | 3         | YOL107W   | 4         |
| YAP7      | 1         | PBI1      | 1         | SFT1      | 3         | RRI2      | 4         |
| CYS3      | 1         | FEX2      | 1         | MRT4      | 3         | MCH4      | 4         |
| NTG1      | 1         | CIT3      | 1         | URB1      | 3         | PEX11     | 4         |
| POP5      | 1         | PDH1      | 1         | MAK11     | 3         | ALG6      | 4         |
| ERV46     | 1         | HAL1      | 1         | PSG1      | 3         | DDL1      | 4         |
| GDH3      | 1         | ICL2      | 1         | DHR2      | 3         | HST3      | 4         |
| FLO9      | 1         | APL4      | 1         | TEF4      | 3         | YOR034C-A | 4         |
| YAL064W   | 1         | TIP41     | 1         | UTP11     | 3         | SHE4      | 4         |
| PAU8      | 1         | THP3      | 1         | LTV1      | 3         | HIR2      | 4         |
| UIP3      | 1         | ARO7      | 1         | RPC25     | 3         | GYP1      | 4         |
| PRM9      | 1         | YPR063C   | 1         | SRP102    | 3         | DIA2      | 4         |
| FLO1      | 1         | SPE3      | 1         | TPK3      | 3         | TGL5      | 4         |
| FUS3      | 1         | NOT5      | 1         | EBP2      | 3         | KTR1      | 4         |
| MRPL16    | 1         | OPY2      | 1         | PRS1      | 3         | AZF1      | 4         |
| PRE7      | 1         | YPR078C   | 1         | SPE1      | 3         | ADE2      | 4         |
| COR1      | 1         | SRP54     | 1         | LOS1      | 3         | SMP3      | 4         |
| PSY4      | 1         | RDS3      | 1         | URA1      | 3         | NFI1      | 4         |
| PIN4      | 1         | MRI1      | 1         | RPC37     | 3         | PNS1      | 4         |
| PTC3      | 1         | CUR1      | 1         | GCN3      | 3         | ULS1      | 4         |
| PTH2      | 1         | YPR159C-A | 1         | TRM2      | 3         | DFR1      | 4         |
| SHP1      | 1         | MET16     | 1         | RPS21A    | 3         | ENV9      | 4         |
| SSA3      | 1         | VPS4      | 1         | UTP30     | 3         | DSE3      | 4         |
| ALG3      | 1         | CCR4      | 2         | DRE2      | 3         | RFM1      | 4         |
| BNA4      | 1         | LTE1      | 2         | TRZ1      | 3         | YOR289W   | 4         |
| SRO77     | 1         | CDC24     | 2         | RPF2      | 3         | BUD7      | 4         |
| YBL109W   | 1         | OAF1      | 2         | NUP133    | 3         | RAX1      | 4         |
| KAP104    | 1         | CDC15     | 2         | SRP40     | 3         | YOR302W   | 4         |
| GAL7      | 1         | SWH1      | 2         | DRS1      | 3         | CPA1      | 4         |
| GIP1      | 1         | IMD1      | 2         | SOF1      | 3         | SFG1      | 4         |
| REG2      | 1         | YAR075W   | 2         | RIX7      | 3         | TEA1      | 4         |
| MNC1      | 1         | HTB2      | 2         | NOC3      | 3         | PYK2      | 4         |
| UBP14     | 1         | HTA2      | 2         | CMS1      | 3         | MNE1      | 4         |
| TIP1      | 1         | PIM1      | 2         | PAM18     | 3         | GDS1      | 4         |
| RFC5      | 1         | POL12     | 2         | RLP24     | 3         | HAP5      | 4         |
| TIM12     | 1         | SAS3      | 2         | MEU1      | 3         | ATF1      | 4         |
| PBY1      | 1         | KIP1      | 2         | FCF2      | 3         | PHR1      | 4         |
| CMD1      | 1         | SEF1      | 2         | MNL2      | 3         | NCR1      | 4         |
| VMA2      | 1         | SEA4      | 2         | FRS1      | 3         | HST2      | 4         |
| CCZ1      | 1         | YBL111C   | 2         | FYV7      | 3         | RAD1      | 4         |
| CDC28     | 1         | DSF2      | 2         | RFU1      | 3         | ISM1      | 4         |
| AIM4      | 1         | HHT1      | 2         | RPL10     | 3         | PDR12     | 4         |
| MSI1      | 1         | GAL1      | 2         | REA1      | 3         | RGL1      | 4         |

**Table S1. Module ID list of genes grouped by WGCNA (cont'd)**

| Gene Name | Module ID |
|-----------|-----------|-----------|-----------|-----------|-----------|-----------|-----------|
| BEM1      | 1         | AKL1      | 2         | RPS31     | 3         | HTC1      | 4         |
| PDB1      | 1         | BAP2      | 2         | DPH5      | 3         | MUK1      | 4         |
| PCS60     | 1         | TAT1      | 2         | CBF5      | 3         | YTA6      | 4         |
| ARC40     | 1         | ECM33     | 2         | EMG1      | 3         | RPS9A     | 4         |
| RRT2      | 1         | IST2      | 2         | PWP1      | 3         | MOT1      | 4         |
| SPO23     | 1         | NHP6B     | 2         | NOP56     | 3         | SEN54     | 4         |
| SHM1      | 1         | CYC8      | 2         | RSA3      | 3         | SSU1      | 4         |
| CHK1      | 1         | RAD16     | 2         | UTP13     | 3         | SEC62     | 4         |
| DUG2      | 1         | TFC1      | 2         | THI7      | 3         | EEB1      | 4         |
| SSH1      | 1         | NPL4      | 2         | GPN3      | 3         | PNG1      | 4         |
| YBR284W   | 1         | DUR1,2    | 2         | DBP9      | 3         | INA17     | 4         |
| APM3      | 1         | YBR225W   | 2         | GCD7      | 3         | MCO76     | 4         |
| VBA2      | 1         | VHC1      | 2         | GSP1      | 3         | CAR1      | 4         |
| MAL33     | 1         | YBR241C   | 2         | EST2      | 3         | RDS2      | 4         |
| PAU24     | 1         | ALG7      | 2         | SGD1      | 3         | ISU1      | 4         |
| LDB16     | 1         | PGS1      | 2         | RPP0      | 3         | FRK1      | 4         |
| GBP2      | 1         | BUD3      | 2         | IKI3      | 3         | YPL162C   | 4         |
| FRM2      | 1         | AGP1      | 2         | UTP21     | 3         | REV3      | 4         |
| HBN1      | 1         | PDI1      | 2         | TSR2      | 3         | COA2      | 4         |
| FUS1      | 1         | ADP1      | 2         | RPS1A     | 3         | THI6      | 4         |
| ATG22     | 1         | PGK1      | 2         | FPR4      | 3         | PCL8      | 4         |
| EMC1      | 1         | SNT1      | 2         | TRM9      | 3         | FLC1      | 4         |
| YCL049C   | 1         | PHO87     | 2         | PSP2      | 3         | ENV7      | 4         |
| APA1      | 1         | YCR061W   | 2         | YML018C   | 3         | ATG41     | 4         |
| CHA1      | 1         | HCM1      | 2         | RRN11     | 3         | HFI1      | 4         |
| CWH43     | 1         | PAT1      | 2         | DUS1      | 3         | SAM3      | 4         |
| PET18     | 1         | CDC39     | 2         | UTP14     | 3         | SPO24     | 4         |
| HSP30     | 1         | OSH2      | 2         | GIM5      | 3         | NHP6A     | 4         |
| AHC2      | 1         | GPR1      | 2         | URA5      | 3         | TFB4      | 4         |
| YCR090C   | 1         | STP4      | 2         | HXT2      | 3         | UBA3      | 4         |
| GIT1      | 1         | PSA1      | 2         | BUD22     | 3         | LTP1      | 4         |
| PAU3      | 1         | USO1      | 2         | ERB1      | 3         | MDM36     | 4         |
| YDL012C   | 1         | PMT1      | 2         | NAM7      | 3         | TMH18     | 4         |
| CDC7      | 1         | NSE4      | 2         | UTP15     | 3         | ISR1      | 4         |
| SLM3      | 1         | CLB3      | 2         | PKR1      | 3         | DBF20     | 4         |
| PRM7      | 1         | SNF3      | 2         | ECM16     | 3         | PIS1      | 4         |
| NAT1      | 1         | GLE1      | 2         | RRB1      | 3         | YPR114W   | 4         |
| MRP10     | 1         | YDL211C   | 2         | RPL13B    | 3         | CLB2      | 4         |
| UBC9      | 1         | WHI4      | 2         | TIF34     | 3         | AXL1      | 4         |
| PEX19     | 1         | GYP7      | 2         | GUA1      | 3         | BSP1      | 4         |
| IDP1      | 1         | LRG1      | 2         | RRP5      | 3         | YPR172W   | 4         |
| CBS1      | 1         | YDR003W-A | 2         | RPS10B    | 3         | DPM1      | 4         |
| QRI1      | 1         | SNQ2      | 2         | RNA1      | 3         | OPT2      | 4         |
| KIN28     | 1         | RAD61     | 2         | RNT1      | 3         | ARR1      | 4         |
| YFH1      | 1         | KCS1      | 2         | YHM2      | 3         | RFA1      | 5         |
| CDC53     | 1         | DOA4      | 2         | TIF11     | 3         | SEN34     | 5         |
| PPH21     | 1         | GIS1      | 2         | HAS1      | 3         | PAU7      | 5         |
| MSH5      | 1         | TMA64     | 2         | ELP6      | 3         | YAT1      | 5         |

**Table S1. Module ID list of genes grouped by WGCNA (cont'd)**

| Gene Name | Module ID |
|-----------|-----------|-----------|-----------|-----------|-----------|-----------|-----------|
| YDL157C   | 1         | ARO1      | 2         | DOM34     | 3         | SHE1      | 5         |
| SFA1      | 1         | DOP1      | 2         | RLP7      | 3         | YBR071W   | 5         |
| PAR32     | 1         | SAC3      | 2         | RCM1      | 3         | RDH54     | 5         |
| AIR2      | 1         | STB3      | 2         | YNL050C   | 3         | UBC4      | 5         |
| YDL177C   | 1         | SND1      | 2         | OCA2      | 3         | FES1      | 5         |
| YDL180W   | 1         | CCT6      | 2         | NOP2      | 3         | PRD1      | 5         |
| MRPL11    | 1         | VPS64     | 2         | GCD10     | 3         | FIG2      | 5         |
| PRR2      | 1         | MSS4      | 2         | IMP4      | 3         | RPT2      | 5         |
| GDH2      | 1         | RAD9      | 2         | YNL095C   | 3         | GRX6      | 5         |
| GCS1      | 1         | MFB1      | 2         | RPC19     | 3         | PMT5      | 5         |
| AAD4      | 1         | HTB1      | 2         | NCS2      | 3         | RPN6      | 5         |
| MPH2      | 1         | HTA1      | 2         | KRE33     | 3         | DUN1      | 5         |
| PSF1      | 1         | VHS1      | 2         | RPC31     | 3         | POL3      | 5         |
| EHD3      | 1         | RMD5      | 2         | YNL162W-A | 3         | RPN5      | 5         |
| ENA5      | 1         | HRQ1      | 2         | NOP13     | 3         | CDC9      | 5         |
| YDR042C   | 1         | SSD1      | 2         | IPI3      | 3         | VMA1      | 5         |
| HEM13     | 1         | RSC3      | 2         | RIO2      | 3         | MSH6      | 5         |
| DET1      | 1         | SWR1      | 2         | SSB2      | 3         | PLP1      | 5         |
| YDR061W   | 1         | EAF1      | 2         | RPA49     | 3         | ADR1      | 5         |
| SHU2      | 1         | TFC6      | 2         | PUS4      | 3         | FMN1      | 5         |
| TFB5      | 1         | ESC2      | 2         | TRF5      | 3         | RPT3      | 5         |
| GRX3      | 1         | SAC7      | 2         | KRI1      | 3         | PAC11     | 5         |
| YDR109C   | 1         | HPT1      | 2         | EMW1      | 3         | TIR1      | 5         |
| ALT2      | 1         | SIZ1      | 2         | RPC34     | 3         | SSA4      | 5         |
| MRX14     | 1         | HKR1      | 2         | SWM2      | 3         | DDI1      | 5         |
| DPB4      | 1         | ARO80     | 2         | URK1      | 3         | MDJ1      | 5         |
| RUB1      | 1         | PPZ2      | 2         | SMM1      | 3         | DAK2      | 5         |
| SAN1      | 1         | SSN2      | 2         | MPP6      | 3         | RPN11     | 5         |
| MKC7      | 1         | YHP1      | 2         | DBP6      | 3         | ECO1      | 5         |
| TAF12     | 1         | LCD1      | 2         | TRM112    | 3         | RPT6      | 5         |
| CDC37     | 1         | PSP1      | 2         | ESF2      | 3         | SPG1      | 5         |
| ARG82     | 1         | URC2      | 2         | RCL1      | 3         | RIM4      | 5         |
| YDR182W-A | 1         | MIT1      | 2         | YOL014W   | 3         | RPN1      | 5         |
| UPS3      | 1         | SPF1      | 2         | TSR4      | 3         | RPN10     | 5         |
| NUP42     | 1         | MCM3      | 2         | NOP12     | 3         | RPN2      | 5         |
| REF2      | 1         | UTR2      | 2         | YOL075C   | 3         | AXL2      | 5         |
| AHA1      | 1         | MNN1      | 2         | BRX1      | 3         | CCT2      | 5         |
| YDR222W   | 1         | PMI40     | 2         | REX4      | 3         | GSM1      | 5         |
| CRF1      | 1         | FIR1      | 2         | WRS1      | 3         | ASF1      | 5         |
| MRPL7     | 1         | GPP2      | 2         | PAP2      | 3         | RFA3      | 5         |
| CHL4      | 1         | VHR2      | 2         | TRM11     | 3         | RBH2      | 5         |
| CTA1      | 1         | MOT2      | 2         | TRM13     | 3         | SPC42     | 5         |
| DIN7      | 1         | RNR1      | 2         | NOP8      | 3         | PRI2      | 5         |
| CIA1      | 1         | DOT6      | 2         | RRP6      | 3         | UBA1      | 5         |
| DON1      | 1         | UBP9      | 2         | UTP23     | 3         | HSP104    | 5         |
| DPL1      | 1         | FLO8      | 2         | DBP5      | 3         | UBI4      | 5         |
| HDA2      | 1         | SLX8      | 2         | ALG8      | 3         | YLL056C   | 5         |
| SUR2      | 1         | PMD1      | 2         | TMA46     | 3         | THI73     | 5         |

**Table S1. Module ID list of genes grouped by WGCNA (cont'd)**

| Gene Name | Module ID | Gene Name  | Module ID | Gene Name | Module ID | Gene Name | Module ID |
|-----------|-----------|------------|-----------|-----------|-----------|-----------|-----------|
| HNT2      | 1         | YER158C    | 2         | RPS28A    | 3         | OSW2      | 5         |
| RQC1      | 1         | DNF1       | 2         | GLN4      | 3         | CDC45     | 5         |
| MRX8      | 1         | RPH1       | 2         | NOC2      | 3         | YPS3      | 5         |
| YPS7      | 1         | GAT1       | 2         | RET1      | 3         | TOS4      | 5         |
| YDR366C   | 1         | EPL1       | 2         | NPT1      | 3         | HSP60     | 5         |
| CTS2      | 1         | STE2       | 2         | RPB10     | 3         | LCB5      | 5         |
| VPS74     | 1         | RIM15      | 2         | TMA16     | 3         | CIS1      | 5         |
| LSM6      | 1         | MIL1       | 2         | NAT5      | 3         | SPP382    | 5         |
| DIT1      | 1         | OTU1       | 2         | GCD1      | 3         | OGG1      | 5         |
| RPN9      | 1         | YFR012W-A  | 2         | YTM1      | 3         | TUB1      | 5         |
| APT2      | 1         | FAB1       | 2         | PLP2      | 3         | PLB2      | 5         |
| GUK1      | 1         | ULI1       | 2         | RRP36     | 3         | UBX4      | 5         |
| NHX1      | 1         | QCR6       | 2         | RPS10A    | 3         | PDS5      | 5         |
| MZM1      | 1         | PHO4       | 2         | RRS1      | 3         | FDO1      | 5         |
| SPS1      | 1         | CDH1       | 2         | YOR338W   | 3         | FAA4      | 5         |
| FIT1      | 1         | TIF4632    | 2         | RPA190    | 3         | DSK2      | 5         |
| IRC22     | 1         | OLE1       | 2         | YOR342C   | 3         | YDJ1      | 5         |
| WBP1      | 1         | SGF73      | 2         | PRT1      | 3         | APJ1      | 5         |
| TIM9      | 1         | AFT1       | 2         | NOP4      | 3         | TOP2      | 5         |
| GEA2      | 1         | MF(ALPHA)2 | 2         | ELP3      | 3         | POL1      | 5         |
| FRD1      | 1         | YGL108C    | 2         | NAN1      | 3         | BNI5      | 5         |
| SIT1      | 1         | SNT2       | 2         | POC4      | 3         | KEX2      | 5         |
| DSF1      | 1         | MRM2       | 2         | NOP53     | 3         | POL2      | 5         |
| FMP52     | 1         | SEC27      | 2         | NIP7      | 3         | SEC21     | 5         |
| NTF2      | 1         | AMS1       | 2         | PUS1      | 3         | CSI2      | 5         |
| BIM1      | 1         | MDS3       | 2         | RVB2      | 3         | ESC8      | 5         |
| RPN3      | 1         | CHC1       | 2         | YAH1      | 3         | LDS2      | 5         |
| SMB1      | 1         | MIG2       | 2         | KEL3      | 3         | MSH2      | 5         |
| YPT31     | 1         | VID30      | 2         | DIM1      | 3         | STI1      | 5         |
| MXR1      | 1         | FZF1       | 2         | TIF6      | 3         | STD1      | 5         |
| SPO73     | 1         | ADH4       | 2         | TIF5      | 3         | CDC21     | 5         |
| RSM18     | 1         | SEC9       | 2         | RPL43A    | 3         | PUP1      | 5         |
| GIP2      | 1         | MSB2       | 2         | TAH18     | 3         | RPT4      | 5         |
| ICP55     | 1         | GSC2       | 2         | MED1      | 3         | RPN8      | 5         |
| YER078W-A | 1         | ACB1       | 2         | DIB1      | 3         | MYO2      | 5         |
| SER3      | 1         | TFC4       | 2         | RPC40     | 3         | PRE10     | 5         |
| AIM11     | 1         | RSC1       | 2         | MRD1      | 3         | SSE1      | 5         |
| SHC1      | 1         | ART5       | 2         | RRP9      | 3         | SPC29     | 5         |
| UBC6      | 1         | ESP1       | 2         | NOC4      | 3         | NAB3      | 5         |
| GLE2      | 1         | YGR125W    | 2         | TIF3      | 3         | HSP82     | 5         |
| TMN3      | 1         | TPO2       | 2         | JIP5      | 3         | ARP7      | 5         |
| PEA2      | 1         | BUB1       | 2         | TFC3      | 4         | PRE2      | 5         |
| GCG1      | 1         | YAP1802    | 2         | MDM10     | 4         | YPR174C   | 5         |
| CCA1      | 1         | RIE1       | 2         | SWC3      | 4         | AQY1      | 5         |
| DMC1      | 1         | TAF1       | 2         | GIP4      | 4         | SIP4      | 6         |
| PUG1      | 1         | GIC1       | 2         | CDC19     | 4         | RDR1      | 6         |
| PAU5      | 1         | IRE1       | 2         | YAR023C   | 4         | USV1      | 6         |
| MOB2      | 1         | NAM8       | 2         | YAR028W   | 4         | FRT2      | 6         |

**Table S1. Module ID list of genes grouped by WGCNA (cont'd)**

| Gene Name | Module ID |
|-----------|-----------|-----------|-----------|-----------|-----------|-----------|-----------|
| YPT1      | 1         | HXT4      | 2         | PDR3      | 4         | CLN3      | 6         |
| EMP47     | 1         | HXT1      | 2         | POP8      | 4         | PEX22     | 6         |
| AAD6      | 1         | KIC1      | 2         | HEK2      | 4         | BDH2      | 6         |
| YFH7      | 1         | SBE22     | 2         | RIB1      | 4         | NTH2      | 6         |
| UBP6      | 1         | KEL1      | 2         | ECM13     | 4         | YBR053C   | 6         |
| RRT5      | 1         | SPC97     | 2         | YBL055C   | 4         | YBR056W   | 6         |
| RSC8      | 1         | YHR175W-A | 2         | AVT5      | 4         | TPS1      | 6         |
| KEG1      | 1         | SKN7      | 2         | ROX3      | 4         | ATG14     | 6         |
| IRC6      | 1         | IMD2      | 2         | MRX3      | 4         | ATG42     | 6         |
| RPN12     | 1         | INP51     | 2         | ECM21     | 4         | MCM7      | 6         |
| MPO1      | 1         | EPS1      | 2         | RTG3      | 4         | SDS24     | 6         |
| YGL015C   | 1         | NEO1      | 2         | PKC1      | 4         | OM14      | 6         |
| KAP122    | 1         | GPP1      | 2         | RER2      | 4         | GLK1      | 6         |
| GET1      | 1         | PRK1      | 2         | EDS1      | 4         | GEX1      | 6         |
| ALK1      | 1         | FYV10     | 2         | QDR3      | 4         | GPD1      | 6         |
| STT3      | 1         | XBP1      | 2         | ZTA1      | 4         | DIA3      | 6         |
| YGL039W   | 1         | SEC24     | 2         | YRO2      | 4         | NDE2      | 6         |
| DST1      | 1         | HOS4      | 2         | PHO5      | 4         | TMA17     | 6         |
| RNA15     | 1         | SIM1      | 2         | VPS15     | 4         | STF1      | 6         |
| NPY1      | 1         | STH1      | 2         | VID24     | 4         | ARF2      | 6         |
| MNP1      | 1         | ASG1      | 2         | YSA1      | 4         | UGX2      | 6         |
| SEH1      | 1         | PAN1      | 2         | LYS2      | 4         | LYS20     | 6         |
| VPS73     | 1         | MND2      | 2         | AGP2      | 4         | FMP45     | 6         |
| ARC1      | 1         | MPS3      | 2         | HSL7      | 4         | ADY3      | 6         |
| MLC1      | 1         | BBC1      | 2         | RTC2      | 4         | YDR018C   | 6         |
| COQ8      | 1         | KAR2      | 2         | TBS1      | 4         | FMP16     | 6         |
| SOH1      | 1         | MHP1      | 2         | AMN1      | 4         | TPS2      | 6         |
| CEG1      | 1         | RTT101    | 2         | SWD3      | 4         | AFR1      | 6         |
| HOS2      | 1         | JEM1      | 2         | EHT1      | 4         | PAM1      | 6         |
| DSD1      | 1         | ICS3      | 2         | DER1      | 4         | GGA1      | 6         |
| SPT16     | 1         | ALY2      | 2         | COS111    | 4         | PDR15     | 6         |
| YPT32     | 1         | DPB11     | 2         | PYC2      | 4         | GRH1      | 6         |
| CLG1      | 1         | SRS2      | 2         | TDP1      | 4         | YEF1      | 6         |
| BOL2      | 1         | IME2      | 2         | ROT2      | 4         | AVT2      | 6         |
| NIF3      | 1         | YJL118W   | 2         | ERT1      | 4         | SPC25     | 6         |
| RTF1      | 1         | PBS2      | 2         | YBR259W   | 4         | CHO1      | 6         |
| GUS1      | 1         | VPS35     | 2         | SAF1      | 4         | EDC2      | 6         |
| BRR6      | 1         | CIS3      | 2         | CTP1      | 4         | PHM8      | 6         |
| YGR026W   | 1         | RBH1      | 2         | YCL002C   | 4         | SPI1      | 6         |
| RPS25A    | 1         | PRP21     | 2         | HIS4      | 4         | ADK2      | 6         |
| YGR035C   | 1         | RAV1      | 2         | POF1      | 4         | HSP12     | 6         |
| MTE1      | 1         | GEF1      | 2         | PEX34     | 4         | AGX1      | 6         |
| SPR3      | 1         | KCH1      | 2         | VAC17     | 4         | YFL041W-A | 6         |
| COX18     | 1         | TOR1      | 2         | YCR007C   | 4         | AQY3      | 6         |
| UPF3      | 1         | BIR1      | 2         | SLM5      | 4         | IGD1      | 6         |
| MRPL25    | 1         | JSN1      | 2         | PMP1      | 4         | HXK1      | 6         |
| PEX8      | 1         | ECM27     | 2         | YCR024C-B | 4         | SCY1      | 6         |
| TOM20     | 1         | YJR115W   | 2         | RHB1      | 4         | STF2      | 6         |

**Table S1. Module ID list of genes grouped by WGCNA (cont'd)**

| Gene Name | Module ID |
|-----------|-----------|-----------|-----------|-----------|-----------|-----------|-----------|
| MRP13     | 1         | RSF2      | 2         | BPH1      | 4         | MSP1      | 6         |
| PDC6      | 1         | DAN4      | 2         | BUD5      | 4         | CTT1      | 6         |
| NNF2      | 1         | PUT3      | 2         | KIN82     | 4         | GPC1      | 6         |
| VOA1      | 1         | MAE1      | 2         | EMA35     | 4         | XKS1      | 6         |
| YGR111W   | 1         | IXR1      | 2         | AAD3      | 4         | YGR237C   | 6         |
| YGR121W-A | 1         | MSN4      | 2         | RTK1      | 4         | SOL4      | 6         |
| FHN1      | 1         | MNR2      | 2         | KNH1      | 4         | GND2      | 6         |
| PRE9      | 1         | LHS1      | 2         | MCH1      | 4         | SHU1      | 6         |
| BTN2      | 1         | SEG2      | 2         | YDL057W   | 4         | APM2      | 6         |
| THI4      | 1         | ABF1      | 2         | RXT3      | 4         | AIM17     | 6         |
| ECL1      | 1         | OAC1      | 2         | RAM1      | 4         | WSC4      | 6         |
| YGR151C   | 1         | MYO3      | 2         | SRF1      | 4         | LEU5      | 6         |
| YGR153W   | 1         | YKL162C   | 2         | RGT2      | 4         | LAM4      | 6         |
| PTI1      | 1         | MCD4      | 2         | UGA3      | 4         | RTC3      | 6         |
| MRPS35    | 1         | NNK1      | 2         | DLD1      | 4         | HXT5      | 6         |
| PEX35     | 1         | FAS1      | 2         | ARF1      | 4         | TDA11     | 6         |
| YIP1      | 1         | TOF2      | 2         | MGT1      | 4         | ATG7      | 6         |
| ATF2      | 1         | SPO14     | 2         | TIM22     | 4         | VID28     | 6         |
| PBP1      | 1         | GAP1      | 2         | BRE4      | 4         | PKP1      | 6         |
| TIM13     | 1         | TRK2      | 2         | GUD1      | 4         | RCI37     | 6         |
| TYS1      | 1         | DYN1      | 2         | COS7      | 4         | SGA1      | 6         |
| TFG1      | 1         | PXL1      | 2         | MAF1      | 4         | OM45      | 6         |
| PDX1      | 1         | PCC1      | 2         | GCV1      | 4         | EGH1      | 6         |
| SNG1      | 1         | ESL2      | 2         | ATG31     | 4         | RPR2      | 6         |
| YGR201C   | 1         | DNM1      | 2         | RAD28     | 4         | YIR016W   | 6         |
| TDA10     | 1         | YEH1      | 2         | MRH1      | 4         | GTT1      | 6         |
| MVB12     | 1         | YLR001C   | 2         | LYS14     | 4         | IML2      | 6         |
| YGR210C   | 1         | PSR2      | 2         | ARO3      | 4         | FMP33     | 6         |
| CRM1      | 1         | IZH3      | 2         | BAP3      | 4         | YJL163C   | 6         |
| MRPL9     | 1         | UBR2      | 2         | PST1      | 4         | TPK1      | 6         |
| PHB2      | 1         | RIC1      | 2         | UBC5      | 4         | MHO1      | 6         |
| MPC3      | 1         | STU2      | 2         | RRG1      | 4         | HUL4      | 6         |
| BRF1      | 1         | SPT8      | 2         | SNF11     | 4         | YUH1      | 6         |
| APL6      | 1         | ERG3      | 2         | SLU7      | 4         | UGP1      | 6         |
| BUD32     | 1         | SMC4      | 2         | VTC5      | 4         | YKL107W   | 6         |
| ZUO1      | 1         | CSF1      | 2         | TMN2      | 4         | RAD27     | 6         |
| BIO2      | 1         | GIS3      | 2         | FIN1      | 4         | DGR2      | 6         |
| MAL11     | 1         | AVL9      | 2         | SDH4      | 4         | GPT2      | 6         |
| SNF6      | 1         | MSL5      | 2         | SPC19     | 4         | ECM4      | 6         |
| GOS1      | 1         | NHA1      | 2         | GTB1      | 4         | SRL3      | 6         |
| VMR1      | 1         | PUT1      | 2         | ADK1      | 4         | SSK1      | 6         |
| CBP2      | 1         | ACS2      | 2         | HEM1      | 4         | EMP46     | 6         |
| ARN1      | 1         | APS1      | 2         | RTN1      | 4         | YLR149C   | 6         |
| YHLO44W   | 1         | HRD3      | 2         | LYS4      | 4         | SHH4      | 6         |
| ARN2      | 1         | RED1      | 2         | AMD2      | 4         | YLR177W   | 6         |
| YHR007C-A | 1         | YLR285C-A | 2         | PRP28     | 4         | MMR1      | 6         |
| ARD1      | 1         | CTS1      | 2         | YDR248C   | 4         | FRE1      | 6         |
| YHR022C   | 1         | MID2      | 2         | SWM1      | 4         | COA4      | 6         |

**Table S1. Module ID list of genes grouped by WGCNA (cont'd)**

| Gene Name | Module ID |
|-----------|-----------|-----------|-----------|-----------|-----------|-----------|-----------|
| VMA16     | 1         | VRP1      | 2         | PEX10     | 4         | MSC3      | 6         |
| YHR033W   | 1         | KAP95     | 2         | HEL2      | 4         | CDD1      | 6         |
| AAP1      | 1         | RSC2      | 2         | GLO2      | 4         | GSY2      | 6         |
| FYV4      | 1         | YLR361C-A | 2         | BSC2      | 4         | TSL1      | 6         |
| QNS1      | 1         | VID22     | 2         | MTH1      | 4         | CUE4      | 6         |
| PPE1      | 1         | PSY3      | 2         | MRX10     | 4         | MSC1      | 6         |
| GRE3      | 1         | SEC61     | 2         | YDR306C   | 4         | EIS1      | 6         |
| GGA2      | 1         | CSR1      | 2         | MCM21     | 4         | YET2      | 6         |
| UBA4      | 1         | NAM2      | 2         | YFT2      | 4         | STB2      | 6         |
| YHR112C   | 1         | SKI2      | 2         | PAL1      | 4         | YMR090W   | 6         |
| BZZ1      | 1         | SFP1      | 2         | SBE2      | 4         | PGM2      | 6         |
| COX23     | 1         | INA1      | 2         | YRA1      | 4         | YMR155W   | 6         |
| CRP1      | 1         | DCK1      | 2         | NCB2      | 4         | PAI3      | 6         |
| MRPL6     | 1         | MAG2      | 2         | ADE8      | 4         | YMR181C   | 6         |
| REC104    | 1         | IMD3      | 2         | NPL3      | 4         | ADD37     | 6         |
| OYE2      | 1         | ECM30     | 2         | TLG1      | 4         | YMR226C   | 6         |
| SVP26     | 1         | CAR2      | 2         | SNM1      | 4         | DFG5      | 6         |
| IKI1      | 1         | RIF2      | 2         | CWC21     | 4         | GAD1      | 6         |
| LNP1      | 1         | ERG6      | 2         | IZH1      | 4         | EOS1      | 6         |
| AIM46     | 1         | ERV25     | 2         | ITR1      | 4         | YNL194C   | 6         |
| CRG1      | 1         | UBX2      | 2         | GMC1      | 4         | NNR1      | 6         |
| CMI7      | 1         | UNG1      | 2         | GNP1      | 4         | YTP1      | 6         |
| CFD1      | 1         | YOX1      | 2         | FPR2      | 4         | ATG2      | 6         |
| YIL024C   | 1         | ORC1      | 2         | YDR524C-B | 4         | MDJ2      | 6         |
| EMC5      | 1         | TCB3      | 2         | SNA2      | 4         | YNR014W   | 6         |
| CKA1      | 1         | RPM2      | 2         | PAD1      | 4         | RRT8      | 6         |
| CBR1      | 1         | VPS9      | 2         | IRC4      | 4         | ATG34     | 6         |
| PIG2      | 1         | NDI1      | 2         | GCN4      | 4         | MDH2      | 6         |
| DFG10     | 1         | PHO84     | 2         | GTT3      | 4         | DNL4      | 6         |
| RNR3      | 1         | ERG5      | 2         | YEL025C   | 4         | PEP12     | 6         |
| MAM33     | 1         | SOK2      | 2         | ECM10     | 4         | RSB1      | 6         |
| CAB2      | 1         | MSN2      | 2         | GLY1      | 4         | YOR062C   | 6         |
| YIL089W   | 1         | STV1      | 2         | HAT2      | 4         | DCS2      | 6         |
| RSM25     | 1         | FET3      | 2         | CAN1      | 4         | MCP1      | 6         |
| PFK26     | 1         | MOT3      | 2         | YEL073C   | 4         | TPO4      | 6         |
| PRM5      | 1         | MYO5      | 2         | PAC2      | 4         | PUT4      | 6         |
| QDR1      | 1         | ADE17     | 2         | MIG3      | 4         | ALD4      | 6         |
| TMA108    | 1         | NCW1      | 2         | ZRG8      | 4         | LSP1      | 6         |
| SSL2      | 1         | EPO1      | 2         | YER034W   | 4         | YPL113C   | 6         |
| SOA1      | 1         | DLT1      | 2         | HVG1      | 4         | RNY1      | 6         |
| IMA3      | 1         | GAT2      | 2         | GLN3      | 4         | AIM44     | 6         |
| PRI1      | 1         | INP2      | 2         | YEN1      | 4         | DAP1      | 6         |
| MSL1      | 1         | MSS11     | 2         | SAP1      | 4         | UIP4      | 6         |
| STS1      | 1         | SGS1      | 2         | YER053C-A | 4         | JID1      | 6         |
| FLO11     | 1         | CLN1      | 2         | FCY2      | 4         | CTR1      | 6         |
| MRS1      | 1         | PFK2      | 2         | PCL6      | 4         | NCE102    | 6         |
| SEC11     | 1         | SCJ1      | 2         | CEM1      | 4         | GPH1      | 6         |
| DCG1      | 1         | SKY1      | 2         | ARG5,6    | 4         | ATG13     | 6         |

**Table S1. Module ID list of genes grouped by WGCNA (cont'd)**

| Gene Name | Module ID |
|-----------|-----------|-----------|-----------|-----------|-----------|-----------|-----------|
| OST1      | 1         | PEP5      | 2         | ALD5      | 4         | GCV3      | 7         |
| CCT8      | 1         | COA6      | 2         | PTC2      | 4         | BOL3      | 7         |
| PET130    | 1         | TPS3      | 2         | BOI2      | 4         | BDH1      | 7         |
| MAD2      | 1         | ZDS1      | 2         | DSE1      | 4         | LDB7      | 7         |
| TAD2      | 1         | CAT8      | 2         | COM2      | 4         | CHS2      | 7         |
| IRC18     | 1         | GOT1      | 2         | YER134C   | 4         | FMP23     | 7         |
| YJL047C-A | 1         | UBP15     | 2         | EMP65     | 4         | YBR137W   | 7         |
| CHM7      | 1         | GAS1      | 2         | UBP5      | 4         | ADH5      | 7         |
| BNA3      | 1         | PBI2      | 2         | OXA1      | 4         | HIS7      | 7         |
| MPM1      | 1         | ARK1      | 2         | BUR6      | 4         | ARO4      | 7         |
| PHS1      | 1         | HDA1      | 2         | RAD4      | 4         | RIB5      | 7         |
| PAM16     | 1         | HHT2      | 2         | PAB1      | 4         | YCR099C   | 7         |
| PHO86     | 1         | NCE103    | 2         | TMT1      | 4         | MDH3      | 7         |
| RPE1      | 1         | VAC7      | 2         | ECM32     | 4         | QRI7      | 7         |
| LSM1      | 1         | AQR1      | 2         | YER186C   | 4         | PCL9      | 7         |
| NIT2      | 1         | FKH2      | 2         | HAC1      | 4         | GGC1      | 7         |
| DPI8      | 1         | NST1      | 2         | RPL22B    | 4         | RRI1      | 7         |
| SFH5      | 1         | APP1      | 2         | SNO3      | 4         | AIM6      | 7         |
| CPS1      | 1         | THO2      | 2         | MIC19     | 4         | SWI5      | 7         |
| SOP4      | 1         | MFA2      | 2         | YFR018C   | 4         | SNU56     | 7         |
| ECM25     | 1         | RHO5      | 2         | PTR3      | 4         | TRP4      | 7         |
| IMA5      | 1         | YNL190W   | 2         | PMC1      | 4         | ARH1      | 7         |
| REE1      | 1         | WHI3      | 2         | YGL007C-A | 4         | HSP31     | 7         |
| YJL218W   | 1         | RAP1      | 2         | PMA1      | 4         | IES6      | 7         |
| POL31     | 1         | CNM67     | 2         | ERG4      | 4         | HIS1      | 7         |
| YJR015W   | 1         | CWC25     | 2         | SCW11     | 4         | VFA1      | 7         |
| ESS1      | 1         | RAD50     | 2         | PUS2      | 4         | HIS2      | 7         |
| TAH11     | 1         | BNI1      | 2         | HNM1      | 4         | PKP2      | 7         |
| ANB1      | 1         | SEC2      | 2         | KXD1      | 4         | CDC43     | 7         |
| MNN14     | 1         | WSC2      | 2         | GUP1      | 4         | TPN1      | 7         |
| CCT5      | 1         | CAF40     | 2         | YGL117W   | 4         | SDT1      | 7         |
| EMC2      | 1         | VNX1      | 2         | GPG1      | 4         | IMO32     | 7         |
| YJR112W-A | 1         | FIG4      | 2         | MET13     | 4         | TIM21     | 7         |
| TDA4      | 1         | NRM1      | 2         | SCS3      | 4         | CLD1      | 7         |
| IBA57     | 1         | ACC1      | 2         | MRF1      | 4         | PCT1      | 7         |
| EFM3      | 1         | SSK2      | 2         | ROG1      | 4         | MAL13     | 7         |
| XPT1      | 1         | SIN3      | 2         | RRT6      | 4         | YHI9      | 7         |
| TIM8      | 1         | TOP1      | 2         | ATG1      | 4         | PIH1      | 7         |
| HOM6      | 1         | YOL019W   | 2         | SIP2      | 4         | PCL5      | 7         |
| YJR149W   | 1         | SIL1      | 2         | SAP4      | 4         | YHR202W   | 7         |
| MRP17     | 1         | SMC5      | 2         | PDE1      | 4         | EST3      | 7         |
| CCE1      | 1         | NGL1      | 2         | ZIP2      | 4         | YIL014C-A | 7         |
| SWD2      | 1         | AVO1      | 2         | RMR1      | 4         | YKE4      | 7         |
| PTM1      | 1         | DUF1      | 2         | HFM1      | 4         | MMF1      | 7         |
| NFU1      | 1         | HAL9      | 2         | MNT2      | 4         | HIS5      | 7         |
| ANR2      | 1         | WSC3      | 2         | NMA2      | 4         | QDR2      | 7         |
| YNK1      | 1         | ZEO1      | 2         | YGR016W   | 4         | IRC24     | 7         |
| MUD2      | 1         | AUS1      | 2         | YGR017W   | 4         | ARG3      | 7         |

**Table S1. Module ID list of genes grouped by WGCNA (cont'd)**

| Gene Name | Module ID | Gene Name  | Module ID | Gene Name | Module ID | Gene Name | Module ID |
|-----------|-----------|------------|-----------|-----------|-----------|-----------|-----------|
| VMA5      | 1         | MSA1       | 2         | BUD9      | 4         | PIR5      | 7         |
| HOT13     | 1         | RGA1       | 2         | RME1      | 4         | OPI3      | 7         |
| MBR1      | 1         | SIA1       | 2         | MUP1      | 4         | STR2      | 7         |
| KTI12     | 1         | SFL1       | 2         | TPC1      | 4         | YKL069W   | 7         |
| PRR1      | 1         | PDR5       | 2         | CLB1      | 4         | CBT1      | 7         |
| SBA1      | 1         | YRM1       | 2         | MEP1      | 4         | PML1      | 7         |
| SRP21     | 1         | DED1       | 2         | CAF130    | 4         | GEP5      | 7         |
| RRN3      | 1         | ABP140     | 2         | SKN1      | 4         | MIM2      | 7         |
| SHE2      | 1         | SRL1       | 2         | CHO2      | 4         | YLR152C   | 7         |
| APL2      | 1         | ISW2       | 2         | ERG1      | 4         | NCW2      | 7         |
| CTK1      | 1         | GNT1       | 2         | YCH1      | 4         | COQ11     | 7         |
| TPO5      | 1         | PMT3       | 2         | SLI1      | 4         | NMA1      | 7         |
| FAT3      | 1         | LDB19      | 2         | PEX21     | 4         | PUN1      | 7         |
| SAC1      | 1         | FRT1       | 2         | HUA1      | 4         | ERV41     | 7         |
| PAP1      | 1         | SCD5       | 2         | YOR1      | 4         | TAF13     | 7         |
| YKR005C   | 1         | MIP1       | 2         | YAP3      | 4         | PEX12     | 7         |
| MEH1      | 1         | KRE5       | 2         | OPI1      | 4         | HOF1      | 7         |
| NTR2      | 1         | NDD1       | 2         | YHL026C   | 4         | ARG7      | 7         |
| NAP1      | 1         | VTC3       | 2         | 38353     | 4         | RPL15B    | 7         |
| FMP46     | 1         | SKS1       | 2         | RPL8A     | 4         | CMC4      | 7         |
| MRS4      | 1         | SVL3       | 2         | TDA3      | 4         | YNL046W   | 7         |
| YSR3      | 1         | YPL039W    | 2         | ARG4      | 4         | NRK1      | 7         |
| HBS1      | 1         | LGE1       | 2         | PUT2      | 4         | ADE12     | 7         |
| MRPL20    | 1         | SUR1       | 2         | MED6      | 4         | DAL82     | 7         |
| TVP38     | 1         | ALD6       | 2         | PTC7      | 4         | SHR5      | 7         |
| SKG1      | 1         | GPI2       | 2         | CTM1      | 4         | ARG8      | 7         |
| RTT109    | 1         | RLM1       | 2         | EPT1      | 4         | RIB4      | 7         |
| LMO1      | 1         | BEM3       | 2         | YHR131C   | 4         | ORT1      | 7         |
| COX17     | 1         | HOS3       | 2         | WSS1      | 4         | MRM1      | 7         |
| PAU17     | 1         | DBP1       | 2         | SPL2      | 4         | ODC2      | 7         |
| ATG10     | 1         | YPL119C-A  | 2         | CHS7      | 4         | SRL4      | 7         |
| LDB18     | 1         | HHO1       | 2         | DSE2      | 4         | ERV2      | 7         |
| AQY2      | 1         | GIP3       | 2         | PEX28     | 4         | YMC1      | 7         |
| YLL053C   | 1         | TCO89      | 2         | CTR2      | 4         | RDS1      | 8         |
| YCT1      | 1         | MF(ALPHA)1 | 2         | YHR182W   | 4         | UME6      | 8         |
| JLP1      | 1         | FAS2       | 2         | GND1      | 4         | RGM1      | 8         |
| YLL058W   | 1         | PLC1       | 2         | MDM31     | 4         | RTG1      | 8         |
| GTT2      | 1         | HAA1       | 2         | BAT1      | 4         | YAR010C   | 8         |
| MHT1      | 1         | SDD4       | 2         | YIL001W   | 4         | ATG8      | 8         |
| AYT1      | 1         | SRO7       | 2         | BET1      | 4         | YBL100W-A | 8         |
| YLL066W-B | 1         | GLN1       | 2         | MNT3      | 4         | ECM2      | 8         |
| SSL1      | 1         | PUF2       | 2         | VHR1      | 4         | PBP2      | 8         |
| EMA19     | 1         | TKL1       | 2         | SNP1      | 4         | SGF29     | 8         |
| YLR053C   | 1         | FHL1       | 2         | YIL067C   | 4         | MRC1      | 8         |
| REX2      | 1         | YPR117W    | 2         | YIL092W   | 4         | SIT4      | 8         |
| SPC3      | 1         | MEP3       | 2         | LYS12     | 4         | CMR1      | 8         |
| XYL2      | 1         | ASN1       | 2         | MOB1      | 4         | CDC34     | 8         |
| PDC5      | 1         | MMS1       | 2         | RPI1      | 4         | RAD55     | 8         |

**Table S1. Module ID list of genes grouped by WGCNA (cont'd)**

| Gene Name | Module ID |
|-----------|-----------|-----------|-----------|-----------|-----------|-----------|-----------|
| SMD3      | 1         | TOD6      | 3         | CSS1      | 4         | DOT1      | 8         |
| PCD1      | 1         | REI1      | 3         | VTH1      | 4         | ADA2      | 8         |
| RNH203    | 1         | MET32     | 3         | DAL2      | 4         | YRF1-1    | 8         |
| YLR154C-H | 1         | STE12     | 3         | LYS1      | 4         | MAG1      | 8         |
| YLR154W-E | 1         | PPR1      | 3         | NRE1      | 4         | PAN2      | 8         |
| UPS2      | 1         | MET31     | 3         | CYR1      | 4         | VAM7      | 8         |
| CDC123    | 1         | SUT2      | 3         | RNR2      | 4         | SPS100    | 8         |
| CPR6      | 1         | MAK16     | 3         | AIM22     | 4         | MCM10     | 8         |
| CDC42     | 1         | RBG1      | 3         | TDH1      | 4         | DSN1      | 8         |
| NEJ1      | 1         | ECM1      | 3         | LOG1      | 4         | VLD1      | 8         |
| BOP2      | 1         | YAR068W   | 3         | ZAP1      | 4         | MEF2      | 8         |
| MCM5      | 1         | NCL1      | 3         | BIT61     | 4         | ENT4      | 8         |
| SMD2      | 1         | YBL036C   | 3         | YJL070C   | 4         | RNP1      | 8         |
| UBC12     | 1         | URA7      | 3         | YJL077W-B | 4         | IOC2      | 8         |
| DPA10     | 1         | UBP13     | 3         | PRY3      | 4         | YLR125W   | 8         |
| TAD3      | 1         | PRS4      | 3         | PRY1      | 4         | SLX4      | 8         |
| REC102    | 1         | KTI11     | 3         | ARP4      | 4         | BDF1      | 8         |
| GAS2      | 1         | RPS8A     | 3         | TAX4      | 4         | NAT4      | 8         |
| NMD4      | 1         | RPL23A    | 3         | GWT1      | 4         | BSC5      | 8         |
| GRX8      | 1         | OLA1      | 3         | LSB6      | 4         | PLB3      | 8         |
| RPS29A    | 1         | RKM3      | 3         | NCA3      | 4         | SPT20     | 8         |
| AFG2      | 1         | PFF1      | 3         | URA2      | 4         | GLO4      | 8         |
| YLR406C-A | 1         | RPG1      | 3         | AIM23     | 4         | SGO1      | 8         |
| YLR412C-A | 1         | MIS1      | 3         | GLG2      | 4         | PTP2      | 8         |
| CNA1      | 1         | MAK5      | 3         | YUR1      | 4         | YOR385W   | 8         |
| VMA6      | 1         | RPB5      | 3         | YAK1      | 4         | NSL1      | 8         |
| YLR460C   | 1         | RPS9B     | 3         | IDS2      | 4         | ACH1      | 9         |
| YLR466C-B | 1         | MET8      | 3         | SMT1      | 4         | HSP26     | 9         |
| TAF11     | 1         | YBR238C   | 3         | HSP150    | 4         | YBR285W   | 9         |
| YML6      | 1         | GPX2      | 3         | ATG36     | 4         | ADY2      | 9         |
| CAT2      | 1         | ENP1      | 3         | ACO2      | 4         | GPM2      | 9         |
| POB3      | 1         | TRS20     | 3         | PEX2      | 4         | HSP42     | 9         |
| BET5      | 1         | EFM2      | 3         | ILV3      | 4         | GLC3      | 9         |
| ALO1      | 1         | RRP7      | 3         | CYC1      | 4         | GSY1      | 9         |
| PRE8      | 1         | GFD2      | 3         | RAD7      | 4         | PNC1      | 9         |
| SEC65     | 1         | SRO9      | 3         | CBF1      | 4         | YGR066C   | 9         |
| CTK3      | 1         | SPB1      | 3         | NTA1      | 4         | RTS3      | 9         |
| PGA3      | 1         | KRR1      | 3         | MOG1      | 4         | ROQ1      | 9         |
| MVP1      | 1         | HTL1      | 3         | BUD4      | 4         | SFC1      | 9         |
| SPO20     | 1         | RPS14A    | 3         | CPA2      | 4         | JEN1      | 9         |
| MRPL3     | 1         | BUD23     | 3         | YMR1      | 4         | TFS1      | 9         |
| ARP9      | 1         | YCR051W   | 3         | JHD2      | 4         | TMA10     | 9         |
| SUB1      | 1         | THR4      | 3         | MNS1      | 4         | SHH3      | 9         |
| SAM37     | 1         | CTR86     | 3         | MCM22     | 4         | SIP18     | 9         |
| RNA14     | 1         | PWP2      | 3         | HIR3      | 4         | YMR196W   | 9         |
| KAR5      | 1         | RSA4      | 3         | HMS2      | 4         | HEF3      | 9         |
| SDD2      | 1         | YCR087C-A | 3         | BAT2      | 4         | MLS1      | 9         |
| YMR085W   | 1         | NOP1      | 3         | CDC16     | 4         | YNL195C   | 9         |

**Table S1. Module ID list of genes grouped by WGCNA (cont'd)**

| Gene Name | Module ID |
|-----------|-----------|-----------|-----------|-----------|-----------|-----------|-----------|
| PDL32     | 1         | DBP10     | 3         | YKL023W   | 4         | GOR1      | 9         |
| SRT1      | 1         | SYO1      | 3         | TUL1      | 4         | YOL131W   | 9         |
| SPG4      | 1         | RPL13A    | 3         | YKL071W   | 4         | GRE1      | 9         |
| JLP2      | 1         | EXP1      | 3         | STB6      | 4         | SUE1      | 9         |
| ERG29     | 1         | RPP1B     | 3         | SMY1      | 4         | GDB1      | 9         |
| YIM1      | 1         | RPL41B    | 3         | CWP2      | 4         | POL30     | 10        |
| MRPS8     | 1         | NOP14     | 3         | RMA1      | 4         | MCD1      | 10        |
| ALD3      | 1         | RPC53     | 3         | OCT1      | 4         | PLM2      | 10        |
| ALD2      | 1         | SAS10     | 3         | KDX1      | 4         | GIN4      | 10        |
| CTL1      | 1         | FAP7      | 3         | PIR3      | 4         | CIN8      | 10        |
| SSO2      | 1         | NRP1      | 3         | PIR1      | 4         | SMC1      | 10        |
| HSC82     | 1         | TRM8      | 3         | KKQ8      | 4         | TUB2      | 10        |
| YMR209C   | 1         | NHP2      | 3         | ASH1      | 4         | CLB6      | 10        |
| FSH2      | 1         | SHR3      | 3         | OSH6      | 4         | ECM29     | 10        |
| YMR230W-A | 1         | YRB1      | 3         | ECM9      | 4         | SPO16     | 10        |
| FUS2      | 1         | FAL1      | 3         | HEL1      | 4         | RTT107    | 10        |
| YMR272W-B | 1         | SES1      | 3         | ALY1      | 4         | IRR1      | 10        |
| RCE1      | 1         | RPC11     | 3         | YKR045C   | 4         | SMC3      | 10        |
| ATM1      | 1         | MAK21     | 3         | GLG1      | 4         | INO1      | 10        |
| ADH2      | 1         | RRP8      | 3         | TFA2      | 4         | SWE1      | 10        |
| ADH6      | 1         | RRP1      | 3         | SIS2      | 4         | HSL1      | 10        |
| ERR3      | 1         | RLI1      | 3         | TGL4      | 4         | MSA2      | 10        |
| ASI3      | 1         | ARX1      | 3         | BAS1      | 4         | YLR342W-A | 10        |
| EFM6      | 1         | TRM1      | 3         | SIR1      | 4         | ERO1      | 10        |
| KTR5      | 1         | GIR2      | 3         | MMM1      | 4         | CTF18     | 10        |
| YNL035C   | 1         | ACL4      | 3         | FRA1      | 4         | SPT21     | 10        |
| IDH1      | 1         | TRM82     | 3         | SDH2      | 4         | INP1      | 10        |
| GPI15     | 1         | CSN9      | 3         | FRE6      | 4         | SCW10     | 10        |
| YNL042W-B | 1         | ATC1      | 3         | MLH2      | 4         | CUZ1      | 10        |
| TOM7      | 1         | EBS1      | 3         | PDC1      | 4         | PCL1      | 10        |
| LAT1      | 1         | GCD6      | 3         | SHM2      | 4         | TOS6      | 10        |
| SWS2      | 1         | BFR2      | 3         | ARP6      | 4         | SLK19     | 10        |
| END3      | 1         | ASP1      | 3         | CHA4      | 4         | CIP1      | 10        |
| RHO2      | 1         | FCF1      | 3         | CFT2      | 4         | RAD53     | 10        |
| YNL108C   | 1         | ESF1      | 3         | ZRT2      | 4         | SVS1      | 10        |
| YNL122C   | 1         | SXM1      | 3         | ACE2      | 4         | ACM1      | 10        |
| SRP1      | 1         | UTP5      | 3         | USB1      | 4         | INO2      | 11        |
| DUG3      | 1         | RRP17     | 3         | CKI1      | 4         | YAP5      | 11        |
| MRX7      | 1         | TIF35     | 3         | DPH6      | 4         | ARG80     | 11        |
| PEX17     | 1         | UTP6      | 3         | ACF2      | 4         | GEM1      | 11        |
| SSU72     | 1         | RMT2      | 3         | YLR173W   | 4         | ADE1      | 11        |
| ELA1      | 1         | RPL37B    | 3         | NMT1      | 4         | FUI1      | 11        |
| CSL4      | 1         | YDR514C   | 3         | BNA5      | 4         | YPK3      | 11        |
| NRD1      | 1         | SNU13     | 3         | HAP1      | 4         | HMT1      | 11        |
| MRPL17    | 1         | TCA17     | 3         | YLR257W   | 4         | YMC2      | 11        |
| TEX1      | 1         | RPL12A    | 3         | YPT6      | 4         | BMT2      | 11        |
| FOL1      | 1         | DLD3      | 3         | PDR8      | 4         | YBR219C   | 11        |
| ORC5      | 1         | RMD6      | 3         | CMG1      | 4         | YBR220C   | 11        |

**Table S1. Module ID list of genes grouped by WGCNA (cont'd)**

| Gene Name | Module ID |
|-----------|-----------|-----------|-----------|-----------|-----------|-----------|-----------|
| YIF1      | 1         | NOP16     | 3         | YLR278C   | 4         | DAS2      | 11        |
| PDR17     | 1         | NUG1      | 3         | MEC3      | 4         | PHM6      | 11        |
| YNL277W-A | 1         | UTP7      | 3         | EXG1      | 4         | ATO3      | 11        |
| HCH1      | 1         | KAP123    | 3         | NKP2      | 4         | RBA50     | 11        |
| CUS2      | 1         | NSA2      | 3         | ILV5      | 4         | BUD16     | 11        |
| BXI1      | 1         | LCP5      | 3         | VPS38     | 4         | IRC7      | 11        |
| MCK1      | 1         | RAD3      | 3         | MDM30     | 4         | STR3      | 11        |
| AAD14     | 1         | SPB4      | 3         | ROM2      | 4         | NCS6      | 11        |
| YNR021W   | 1         | BUD27     | 3         | STP3      | 4         | YHB1      | 11        |
| MRPL50    | 1         | SNZ3      | 3         | VPS33     | 4         | TNA1      | 11        |
| SNF12     | 1         | LOC1      | 3         | SEI1      | 4         | ERC1      | 11        |
| CPR8      | 1         | NIC96     | 3         | ATG17     | 4         | RPL16A    | 11        |
| EGO4      | 1         | RPL2A     | 3         | TUS1      | 4         | NMD5      | 11        |
| AGA1      | 1         | CGR1      | 3         | USA1      | 4         | SRY1      | 11        |
| MSO1      | 1         | RPL30     | 3         | SUR7      | 4         | MTD1      | 11        |
| FRE4      | 1         | DBP3      | 3         | SML1      | 4         | BMT6      | 11        |
| YNR071C   | 1         | LSG1      | 3         | NTE1      | 4         | SAM1      | 11        |
| AIF1      | 1         | NSA1      | 3         | ITT1      | 4         | ADE13     | 11        |
| COQ10     | 1         | PRP43     | 3         | HMG1      | 4         | RPS22B    | 11        |
| YOL024W   | 1         | RPL1B     | 3         | WAR1      | 4         | RPL31B    | 11        |
| GAS5      | 1         | SUA5      | 3         | PML39     | 4         | RPL6B     | 11        |
| OPI10     | 1         | ROK1      | 3         | ATR1      | 4         | OST6      | 11        |
| GSH2      | 1         | GCN1      | 3         | CDC5      | 4         | SNO1      | 11        |
| YOL057W   | 1         | CSE1      | 3         | PLB1      | 4         | NUP53     | 11        |
| RIB2      | 1         | YGR054W   | 3         | SEC59     | 4         | RIT1      | 11        |
| PHM7      | 1         | DRN1      | 3         | STB4      | 4         | AAH1      | 11        |
| MPD2      | 1         | RRP46     | 3         | FMS1      | 4         | YPQ1      | 11        |
| SPO21     | 1         | NOP7      | 3         | MAC1      | 4         | NRT1      | 11        |
| YOL097W-A | 1         | PPT1      | 3         | MSS1      | 4         | RGS2      | 11        |
| IZH4      | 1         | UTP8      | 3         | CSI1      | 4         | SWT1      | 11        |
| SKM1      | 1         | ENP2      | 3         | MIH1      | 4         | TGS1      | 11        |
| PTH4      | 1         | RBG2      | 3         | IOC4      | 4         | UTP20     | 12        |
| HRP1      | 1         | SKI6      | 3         | AAC1      | 4         | FUR4      | 12        |
| GAS4      | 1         | ZPR1      | 3         | AEP1      | 4         | PHO3      | 12        |
| BSC6      | 1         | SDA1      | 3         | SEG1      | 4         | TSR1      | 12        |
| RRP40     | 1         | EFG1      | 3         | SNZ1      | 4         | UTP4      | 12        |
| GRE2      | 1         | PXR1      | 3         | MUB1      | 4         | PUF6      | 12        |
| FRE7      | 1         | YGR283C   | 3         | YMR102C   | 4         | RPS8B     | 12        |
| YOL162W   | 1         | RPS20     | 3         | YKU80     | 4         | NSR1      | 12        |
| YSP3      | 1         | YHL017W   | 3         | ASI1      | 4         | ELP2      | 12        |
| SGT2      | 1         | EFM1      | 3         | GID8      | 4         | UTP25     | 12        |
| TIR4      | 1         | RPS27B    | 3         | NDE1      | 4         | BMT5      | 12        |
| TIR2      | 1         | BCD1      | 3         | LDO16     | 4         | UTP10     | 12        |
| HSP10     | 1         | INM1      | 3         | DNF3      | 4         | LIA1      | 12        |
| HMS1      | 1         | CIC1      | 3         | MLH1      | 4         | JJJ3      | 12        |
| YOR032W-A | 1         | RPP1      | 3         | CEP3      | 4         | DBP7      | 12        |
| EXO1      | 1         | SSZ1      | 3         | HOT1      | 4         | DIP2      | 12        |
| CYC2      | 1         | RRP3      | 3         | ECM5      | 4         | IFH1      | 12        |

**Table S1. Module ID list of genes grouped by WGCNA (cont'd)**

| Gene Name | Module ID |
|-----------|-----------|-----------|-----------|-----------|-----------|-----------|-----------|
| CRC1      | 1         | RRP4      | 3         | CIK1      | 4         | IMD4      | 12        |
| VAM3      | 1         | TRM5      | 3         | ERG12     | 4         | DAT1      | 12        |
| CEX1      | 1         | NOP10     | 3         | MRE11     | 4         | YMR310C   | 12        |
| GET4      | 1         | RPF1      | 3         | PPA2      | 4         | NOP15     | 12        |
| LCB4      | 1         | GAR1      | 3         | PRM15     | 4         | DBP2      | 12        |
| MPC54     | 1         | FUR1      | 3         | YKU70     | 4         | NOG2      | 12        |
| YOR186W   | 1         | RPC10     | 3         | TDA1      | 4         | TRM10     | 12        |
| SPR1      | 1         | IMP3      | 3         | YMR295C   | 4         | NOB1      | 12        |
| MCA1      | 1         | DBP8      | 3         | ADE4      | 4         | RKI1      | 12        |
| MKK1      | 1         | NMD3      | 3         | TGL3      | 4         | RAS1      | 12        |
| HES1      | 1         | EGD2      | 3         | YMR315W   | 4         | PUS7      | 12        |
| SSP2      | 1         | UTP9      | 3         | PET8      | 4         | RPA43     | 12        |
| CDC31     | 1         | RIX1      | 3         | YNL011C   | 4         | RRP12     | 12        |
| CAF20     | 1         | RPL2B     | 3         | SSN8      | 4         | NOG1      | 12        |
| RDL2      | 1         | FAF1      | 3         | SFB2      | 4         | BMS1      | 12        |
| TIM18     | 1         | EFM4      | 3         | SUN4      | 4         | NEW1      | 12        |
| MUM3      | 1         | AIR1      | 3         | NIS1      | 4         | RPA135    | 12        |
| RRG7      | 1         | DPH1      | 3         | YNL092W   | 4         | SEO1      | 13        |
| SNU66     | 1         | SHQ1      | 3         | RAS2      | 4         | SUS1      | 13        |
| VMA4      | 1         | HPM1      | 3         | MET4      | 4         | MRPS5     | 13        |
| UBC11     | 1         | RRT14     | 3         | LEU4      | 4         | RAD59     | 13        |
| CIN1      | 1         | PAN6      | 3         | FAR11     | 4         | CAB1      | 13        |
| SOG2      | 1         | RPL40A    | 3         | FYV6      | 4         | VTC1      | 13        |
| SNX3      | 1         | SUC2      | 3         | YNL146W   | 4         | AGP3      | 13        |
| FIT2      | 1         | SQT1      | 3         | ALF1      | 4         | MET10     | 13        |
| FIT3      | 1         | YVH1      | 3         | ASI2      | 4         | CDC20     | 13        |
| YOR389W   | 1         | RPC17     | 3         | YGP1      | 4         | LAG1      | 13        |
| FEX1      | 1         | VTC4      | 3         | PSD1      | 4         | FMO1      | 13        |
| RQC2      | 1         | HCA4      | 3         | APC1      | 4         | SER33     | 13        |
| RET3      | 1         | MTR4      | 3         | SWT21     | 4         | OPT1      | 13        |
| ARL3      | 1         | TIM54     | 3         | MGS1      | 4         | MET3      | 13        |
| LEE1      | 1         | UTP18     | 3         | POP1      | 4         | CUE2      | 13        |
| MFM1      | 1         | CCT7      | 3         | ATG4      | 4         | MET1      | 13        |
| VPS28     | 1         | ALB1      | 3         | MPA43     | 4         | MMP1      | 13        |
| YPL071C   | 1         | GCD14     | 3         | RTC4      | 4         | COQ5      | 13        |
| KAP120    | 1         | RPA34     | 3         | GIS2      | 4         | ADI1      | 13        |
| PXA1      | 1         | PFD1      | 3         | MSB3      | 4         | IMP2      | 13        |
| RRD2      | 1         | RPL39     | 3         | MRX6      | 4         | ERG8      | 13        |
| MEX67     | 1         | RPS22A    | 3         | SKP2      | 4         | SOL1      | 13        |
| MRPL40    | 1         | NUC1      | 3         | PFS2      | 4         | YNR061C   | 13        |
| CBC2      | 1         | MPP10     | 3         | LEM3      | 4         | ENB1      | 13        |
| PPQ1      | 1         | SUI2      | 3         | EGT2      | 4         | YOL163W   | 13        |
| CTI6      | 1         | URB2      | 3         | PEX6      | 4         | BDS1      | 13        |
| MRN1      | 1         | RPA12     | 3         | PET494    | 4         | UAF30     | 13        |
| GUP2      | 1         | HAM1      | 3         | LYS9      | 4         | YPR071W   | 13        |
