# Supplementary material for: Time-dependent re-organization of biological processes by the analysis of the dynamic transcriptional response of yeast cells to doxorubicin
Source: Royal Society of Chemistry journal article supplement (doi:10.1039/d1mo00046b), 2021-05-25
Supplement: d1mo00046b3.pdf [file d1mo00046b3.pdf]

**Table S2. Functional Annotations of the modules identified by WGCNA**  
(Modules M8, M9 and M11 have no significant association)

| Module ID | Category   | Description                                                                                                                                         | Number of genes | q-value  |
|-----------|------------|-----------------------------------------------------------------------------------------------------------------------------------------------------|-----------------|----------|
| M1        | GO_BP_TERM | siderophore transport                                                                                                                               | 7               | 2,4E-2   |
|           | KEGG       | mRNA surveillance pathway                                                                                                                           | 14              | 2,1E-2   |
| M2        | GO_BP_TERM | regulation of transcription, DNA-templated                                                                                                          | 79              | 4,1E-10  |
|           | GO_BP_TERM | transcription, DNA-templated                                                                                                                        | 75              | 7,5E-8   |
|           | GO_BP_TERM | positive regulation of transcription from RNA polymerase II promoter                                                                                | 36              | 3,2E-5   |
|           | GO_BP_TERM | fungal-type cell wall organization                                                                                                                  | 24              | 1,0E-2   |
|           | KEGG       | MAPK signaling pathway - yeast                                                                                                                      | 15              | 2,8E-5   |
|           | KEGG       | Meiosis - yeast                                                                                                                                     | 19              | 6,2E-3   |
|           | KEGG       | Protein processing in endoplasmic reticulum                                                                                                         | 15              | 5,8E-3   |
| M3        | GO_BP_TERM | ribosome biogenesis                                                                                                                                 | 124             | 1,2E-101 |
|           | GO_BP_TERM | rRNA processing                                                                                                                                     | 117             | 8,5E-89  |
|           | GO_BP_TERM | rRNA methylation                                                                                                                                    | 40              | 1,9E-31  |
|           | GO_BP_TERM | ribosomal large subunit biogenesis                                                                                                                  | 34              | 3,1E-25  |
|           | GO_BP_TERM | maturation of SSU-rRNA from tricistronic rRNA transcript (SSU-rRNA, 5.8S rRNA, LSU-rRNA)                                                            | 37              | 2,1E-23  |
|           | GO_BP_TERM | endonucleolytic cleavage in ITS1 to separate SSU-rRNA from 5.8S rRNA and LSU-rRNA from tricistronic rRNA transcript (SSU-rRNA, 5.8S rRNA, LSU-rRNA) | 29              | 3,4E-22  |
|           | GO_BP_TERM | maturation of LSU-rRNA from tricistronic rRNA transcript (SSU-rRNA, 5.8S rRNA, LSU-rRNA)                                                            | 27              | 6,2E-22  |
|           | GO_BP_TERM | endonucleolytic cleavage in 5'-ETS of tricistronic rRNA transcript (SSU-rRNA, 5.8S rRNA, LSU-rRNA)                                                  | 23              | 1,2E-18  |
|           | GO_BP_TERM | endonucleolytic cleavage to generate mature 5'-end of SSU-rRNA from (SSU-rRNA, 5.8S rRNA, LSU-rRNA)                                                 | 22              | 1,1E-16  |
|           | GO_BP_TERM | maturation of 5.8S rRNA from tricistronic rRNA transcript (SSU-rRNA, 5.8S rRNA, LSU-rRNA)                                                           | 16              | 1,0E-13  |
|           | GO_BP_TERM | ribosomal large subunit assembly                                                                                                                    | 21              | 5,1E-13  |
|           | GO_BP_TERM | tRNA transcription from RNA polymerase III promoter                                                                                                 | 13              | 1,7E-9   |
|           | GO_BP_TERM | ribosomal small subunit biogenesis                                                                                                                  | 16              | 1,7E-9   |
|           | GO_BP_TERM | termination of RNA polymerase III transcription                                                                                                     | 12              | 5,9E-9   |
|           | GO_BP_TERM | methylation                                                                                                                                         | 25              | 8,7E-9   |
|           | GO_BP_TERM | RNA secondary structure unwinding                                                                                                                   | 14              | 5,1E-8   |
|           | GO_BP_TERM | tRNA methylation                                                                                                                                    | 12              | 1,0E-6   |
|           | GO_BP_TERM | transcription elongation from RNA polymerase III promoter                                                                                           | 12              | 1,0E-6   |
|           | GO_BP_TERM | transcription from RNA polymerase III promoter                                                                                                      | 12              | 4,6E-6   |
|           | GO_BP_TERM | tRNA processing                                                                                                                                     | 22              | 4,4E-6   |
|           | GO_BP_TERM | translational initiation                                                                                                                            | 15              | 3,3E-5   |
|           | GO_BP_TERM | tRNA modification                                                                                                                                   | 13              | 3,2E-5   |
|           | GO_BP_TERM | translation                                                                                                                                         | 43              | 4,4E-5   |
|           | GO_BP_TERM | cytoplasmic translation                                                                                                                             | 28              | 1,3E-4   |
|           | GO_BP_TERM | regulation of translational initiation                                                                                                              | 9               | 1,9E-4   |
|           | GO_BP_TERM | assembly of large subunit precursor of preribosome                                                                                                  | 7               | 2,0E-4   |
|           | GO_BP_TERM | U4 snRNA 3'-end processing                                                                                                                          | 8               | 2,9E-4   |

|                | Category   | Description                                                                                                                      | Number of genes             | q-value |
|----------------|------------|----------------------------------------------------------------------------------------------------------------------------------|-----------------------------|---------|
| M3<br>(cont'd) | GO_BP_TERM | transcription from RNA polymerase I promoter                                                                                     | 9                           | 4,1E-4  |
|                | GO_BP_TERM | ribosomal large subunit export from nucleus                                                                                      | 10                          | 4,2E-4  |
|                | GO_BP_TERM | nuclear polyadenylation-dependent tRNA catabolic process                                                                         | 8                           | 4,4E-4  |
|                | GO_BP_TERM | ribosomal subunit export from nucleus                                                                                            | 7                           | 6,7E-4  |
|                | GO_BP_TERM | nuclear polyadenylation-dependent rRNA catabolic process                                                                         | 8                           | 1,6E-3  |
|                | GO_BP_TERM | formation of translation preinitiation complex                                                                                   | 8                           | 1,6E-3  |
|                | GO_BP_TERM | polyadenylation-dependent snoRNA 3'-end processing                                                                               | 7                           | 2,9E-3  |
|                | GO_BP_TERM | nuclear polyadenylation-dependent mRNA catabolic process                                                                         | 7                           | 2,9E-3  |
|                | GO_BP_TERM | maturation of SSU-rRNA                                                                                                           | 7                           | 2,9E-3  |
|                | GO_BP_TERM | nuclear polyadenylation-dependent CUT catabolic process                                                                          | 6                           | 2,9E-3  |
|                | GO_BP_TERM | snRNA pseudouridine synthesis                                                                                                    | 5                           | 3,2E-3  |
|                | GO_BP_TERM | exonucleolytic trimming to generate mature 3'-end of 5.8S rRNA from tricistronic rRNA transcript (SSU-rRNA, 5.8S rRNA, LSU-rRNA) | 7                           | 8,3E-3  |
|                | GO_BP_TERM | ribosomal small subunit assembly                                                                                                 | 8                           | 1,2E-2  |
|                | GO_BP_TERM | rRNA modification                                                                                                                | 5                           | 1,2E-2  |
|                | GO_BP_TERM | maturation of LSU-rRNA                                                                                                           | 6                           | 1,6E-2  |
|                | GO_BP_TERM | RNA processing                                                                                                                   | 8                           | 2,7E-2  |
|                | GO_BP_TERM | nuclear mRNA surveillance of mRNA 3'-end processing                                                                              | 4                           | 2,9E-2  |
|                | GO_BP_TERM | ncRNA polyadenylation                                                                                                            | 4                           | 2,9E-2  |
|                | GO_BP_TERM | nuclear polyadenylation-dependent snoRNA catabolic process                                                                       | 4                           | 2,9E-2  |
|                | GO_BP_TERM | nuclear polyadenylation-dependent snRNA catabolic process                                                                        | 4                           | 2,9E-2  |
|                | GO_BP_TERM | nucleoside metabolic process                                                                                                     | 6                           | 2,9E-2  |
|                | KEGG       | Ribosome biogenesis in eukaryotes                                                                                                | 38                          | 7,0E-21 |
|                | KEGG       | RNA polymerase                                                                                                                   | 16                          | 1,4E-9  |
|                | KEGG       | Pyrimidine metabolism                                                                                                            | 21                          | 1,6E-7  |
|                | KEGG       | RNA transport                                                                                                                    | 22                          | 2,6E-6  |
|                | KEGG       | Purine metabolism                                                                                                                | 21                          | 1,7E-5  |
|                | M4         | KEGG                                                                                                                             | Biosynthesis of antibiotics | 37      |
| KEGG           |            | Metabolic pathways                                                                                                               | 74                          | 4,1E-4  |
| KEGG           |            | Biosynthesis of secondary metabolites                                                                                            | 41                          | 3,6E-4  |
| KEGG           |            | Biosynthesis of amino acids                                                                                                      | 23                          | 5,1E-4  |
| KEGG           |            | Lysine biosynthesis                                                                                                              | 6                           | 1,4E-2  |
| KEGG           |            | 2-Oxocarboxylic acid metabolism                                                                                                  | 9                           | 3,2E-2  |
| M5             | GO_BP_TERM | proteasome-mediated ubiquitin-dependent protein catabolic process                                                                | 10                          | 2,6E-5  |
|                | GO_BP_TERM | ubiquitin-dependent protein catabolic process                                                                                    | 10                          | 1,7E-4  |
|                | GO_BP_TERM | protein folding                                                                                                                  | 10                          | 2,1E-3  |
|                | GO_BP_TERM | DNA replication                                                                                                                  | 9                           | 2,4E-3  |

|                | Category   | Description                                                                                        | Number of genes                | q-value |
|----------------|------------|----------------------------------------------------------------------------------------------------|--------------------------------|---------|
| M5<br>(cont'd) | GO_BP_TERM | positive regulation of proteasomal protein catabolic process                                       | 4                              | 5,0E-3  |
|                | GO_BP_TERM | 'de novo' protein folding                                                                          | 4                              | 5,0E-3  |
|                | GO_BP_TERM | protein refolding                                                                                  | 5                              | 5,3E-3  |
|                | GO_BP_TERM | nucleotide-excision repair                                                                         | 6                              | 5,4E-3  |
|                | GO_BP_TERM | ER-associated ubiquitin-dependent protein catabolic process                                        | 7                              | 5,9E-3  |
|                | GO_BP_TERM | reciprocal meiotic recombination                                                                   | 7                              | 8,8E-3  |
|                | GO_BP_TERM | protein catabolic process                                                                          | 5                              | 9,8E-3  |
|                | GO_BP_TERM | proteasome regulatory particle assembly                                                            | 4                              | 1,8E-2  |
|                | GO_BP_TERM | positive regulation of RNA polymerase II transcriptional preinitiation complex assembly            | 4                              | 2,1E-2  |
|                | KEGG       | Proteasome                                                                                         | 14                             | 4,2E-13 |
|                | KEGG       | DNA replication                                                                                    | 6                              | 4,6E-3  |
|                | KEGG       | Mismatch repair                                                                                    | 5                              | 5,6E-3  |
|                | KEGG       | Base excision repair                                                                               | 4                              | 3,8E-2  |
|                | M6         | GO_BP_TERM                                                                                         | trehalose biosynthetic process | 5       |
| GO_BP_TERM     |            | carbohydrate metabolic process                                                                     | 12                             | 3,0E-3  |
| KEGG           |            | Starch and sucrose metabolism                                                                      | 11                             | 6,0E-8  |
| KEGG           |            | Biosynthesis of secondary metabolites                                                              | 16                             | 5,0E-3  |
| KEGG           |            | Biosynthesis of antibiotics                                                                        | 13                             | 8,8E-3  |
| KEGG           |            | Metabolic pathways                                                                                 | 24                             | 1,5E-2  |
| KEGG           |            | Carbon metabolism                                                                                  | 8                              | 4,9E-2  |
| M7             | GO_BP_TERM | cellular amino acid biosynthetic process                                                           | 11                             | 7,7E-5  |
|                | GO_BP_TERM | histidine biosynthetic process                                                                     | 4                              | 2,3E-2  |
|                | GO_BP_TERM | arginine biosynthetic process                                                                      | 4                              | 2,1E-2  |
|                | GO_BP_TERM | biosynthetic process                                                                               | 5                              | 3,0E-2  |
|                | KEGG       | Biosynthesis of secondary metabolites                                                              | 16                             | 1,5E-5  |
|                | KEGG       | Biosynthesis of amino acids                                                                        | 10                             | 1,8E-4  |
|                | KEGG       | Metabolic pathways                                                                                 | 20                             | 7,0E-4  |
|                | KEGG       | Histidine metabolism                                                                               | 4                              | 3,9E-3  |
| M10            | GO_BP_TERM | cell cycle                                                                                         | 12                             | 1,4E-5  |
|                | GO_BP_TERM | cell division                                                                                      | 10                             | 1,6E-5  |
|                | GO_BP_TERM | mitotic nuclear division                                                                           | 8                              | 1,0E-4  |
|                | GO_BP_TERM | mitotic sister chromatid cohesion                                                                  | 5                              | 3,2E-4  |
|                | GO_BP_TERM | morphogenesis checkpoint                                                                           | 3                              | 3,3E-3  |
|                | KEGG       | Cell cycle - yeast                                                                                 | 11                             | 4,9E-10 |
|                | KEGG       | Meiosis - yeast                                                                                    | 7                              | 2,0E-4  |
|                | M12        | GO_BP_TERM                                                                                         | ribosome biogenesis            | 17      |
| GO_BP_TERM     |            | rRNA processing                                                                                    | 12                             | 5,2E-7  |
| GO_BP_TERM     |            | maturation of SSU-rRNA from tricistronic rRNA transcript (SSU-rRNA, 5.8S rRNA, LSU-rRNA)           | 7                              | 7,8E-5  |
| GO_BP_TERM     |            | rRNA methylation                                                                                   | 6                              | 4,2E-4  |
| GO_BP_TERM     |            | endonucleolytic cleavage in 5'-ETS of tricistronic rRNA transcript (SSU-rRNA, 5.8S rRNA, LSU-rRNA) | 4                              | 1,2E-2  |

|                 | Category   | Description                                                                                         | Number of genes | q-value |
|-----------------|------------|-----------------------------------------------------------------------------------------------------|-----------------|---------|
| M12<br>(cont'd) | GO_BP_TERM | endonucleolytic cleavage to generate mature 5'-end of SSU-rRNA from (SSU-rRNA, 5.8S rRNA, LSU-rRNA) | 4               | 1,1E-2  |
|                 | KEGG       | Ribosome biogenesis in eukaryotes                                                                   | 7               | 1,6E-5  |
| M13             | GO_BP_TERM | methionine biosynthetic process                                                                     | 4               | 3,7E-2  |
|                 | GO_BP_TERM | cellular amino acid biosynthetic process                                                            | 5               | 4,2E-2  |
|                 | GO_BP_TERM | sulfate assimilation                                                                                | 3               | 2,9E-2  |
